# Supplementary material
Source: PubMed Central journal article supplement (PMC7124978)
Supplement: NIHMS1545018-supplement-2.pdf [file NIHMS1545018-supplement-2.pdf]

**Figure S1.** Pharmacokinetic model structure for cyclophosphamide, 4OH-CTX, and CEPM.

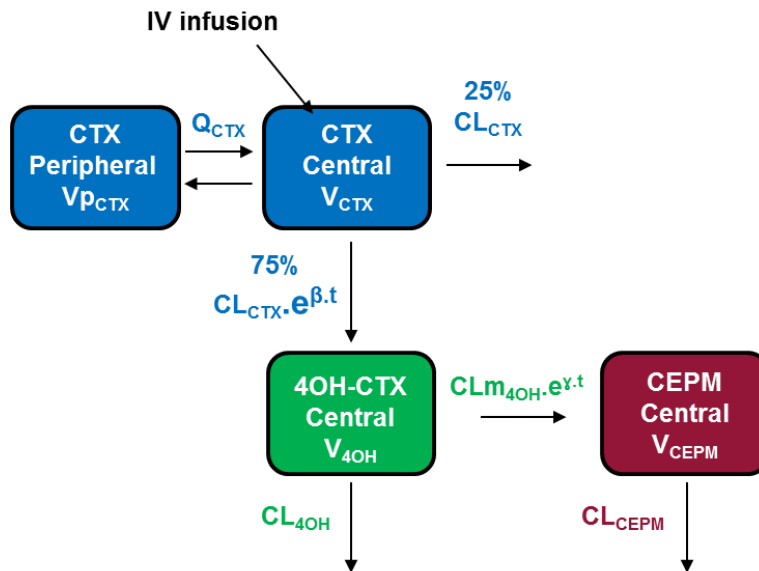

Cyclophosphamide data were fitted with a two-compartment model (blue structure), parameterized with central volume  $V_{CTX}$ , and clearance  $CL_{CTX}$ , peripheral volume  $V_{p_{CTX}}$ , and clearance  $Q_{CTX}$ .  $CL_{CTX}$  was divided in two processes. 75% of cyclophosphamide clearance accounted for the formation of 4OH-CTX (3-7), denoted as the cyclophosphamide metabolic clearance  $CL_{m_{CTX}}$ . A time-dependent coefficient  $\beta$  was associated with  $CL_{m_{CTX}}$ , such that  $CL_{m_{CTX}}$  increased with time in an exponential manner. The remaining 25% of cyclophosphamide elimination accounted for other metabolic processes and urinary excretion.

4OH-CTX data were fitted with a one-compartment model (green structure), parameterized with apparent volume  $V_{4OH}$  and two clearances  $CL_{m_{4OH}}$  and  $CL_{4OH}$ .  $CL_{m_{4OH}}$  represents the metabolic clearance leading to the formation of CEPM. Similar to  $CL_{m_{CTX}}$ , a time-dependent coefficient  $\gamma$  was associated with  $CL_{m_{4OH}}$ , such that  $CL_{m_{4OH}}$  increased with time in an exponential manner.  $CL_{4OH}$  accounted for other elimination processes.

CEPM data were fitted with a one-compartment model (red structure), parameterized with apparent volume  $V_{CEPM}$  and linear clearance  $CL_{CEPM}$ .
