# Supplementary material
Source: PubMed Central journal article supplement (PMC7124978)

**Figure S2.** Time-dependent cyclophosphamide (left) and 4OH-CTX (right) metabolic clearances. Each line represents a patient cyclophosphamide and 4OH-CTX metabolic clearance profile. Cyclophosphamide and 4OH-CTX metabolic clearances, which controlled the formation of 4OH-CTX and CEPM, respectively, increased with time in an exponential manner. On average, cyclophosphamide and 4OH-CTX metabolic clearances increased by 2.4 and 2.1-fold at 24 hours post dose.

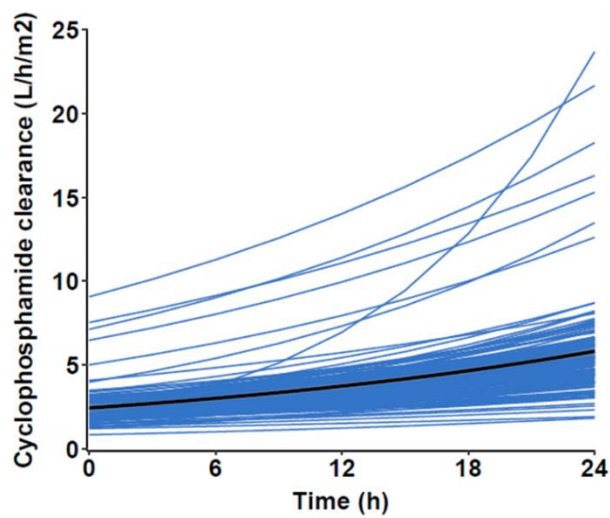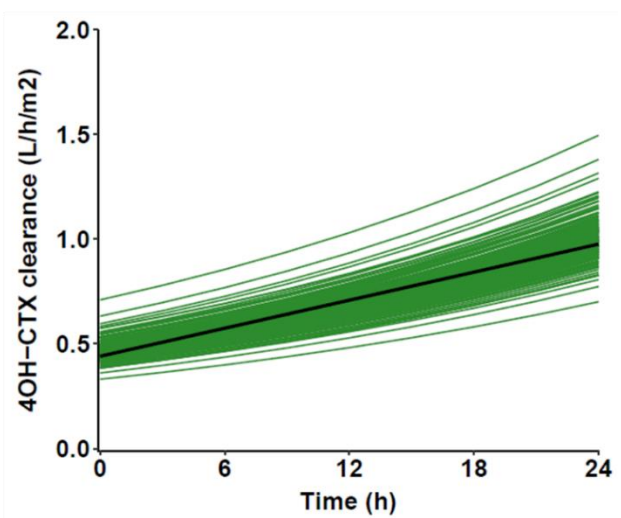

Supplement: NIHMS1545018-supplement-3.pdf [file NIHMS1545018-supplement-3.pdf]
