# Supplementary material
Source: PubMed Central journal article supplement (PMC7124978)
Supplement: NIHMS1545018-supplement-4.pdf [file NIHMS1545018-supplement-4.pdf]

**Figure S3.** Goodness-of-fit plots of the pharmacokinetic base model for cyclophosphamide (A), 4OH-CTX (B), and CEPM (C).

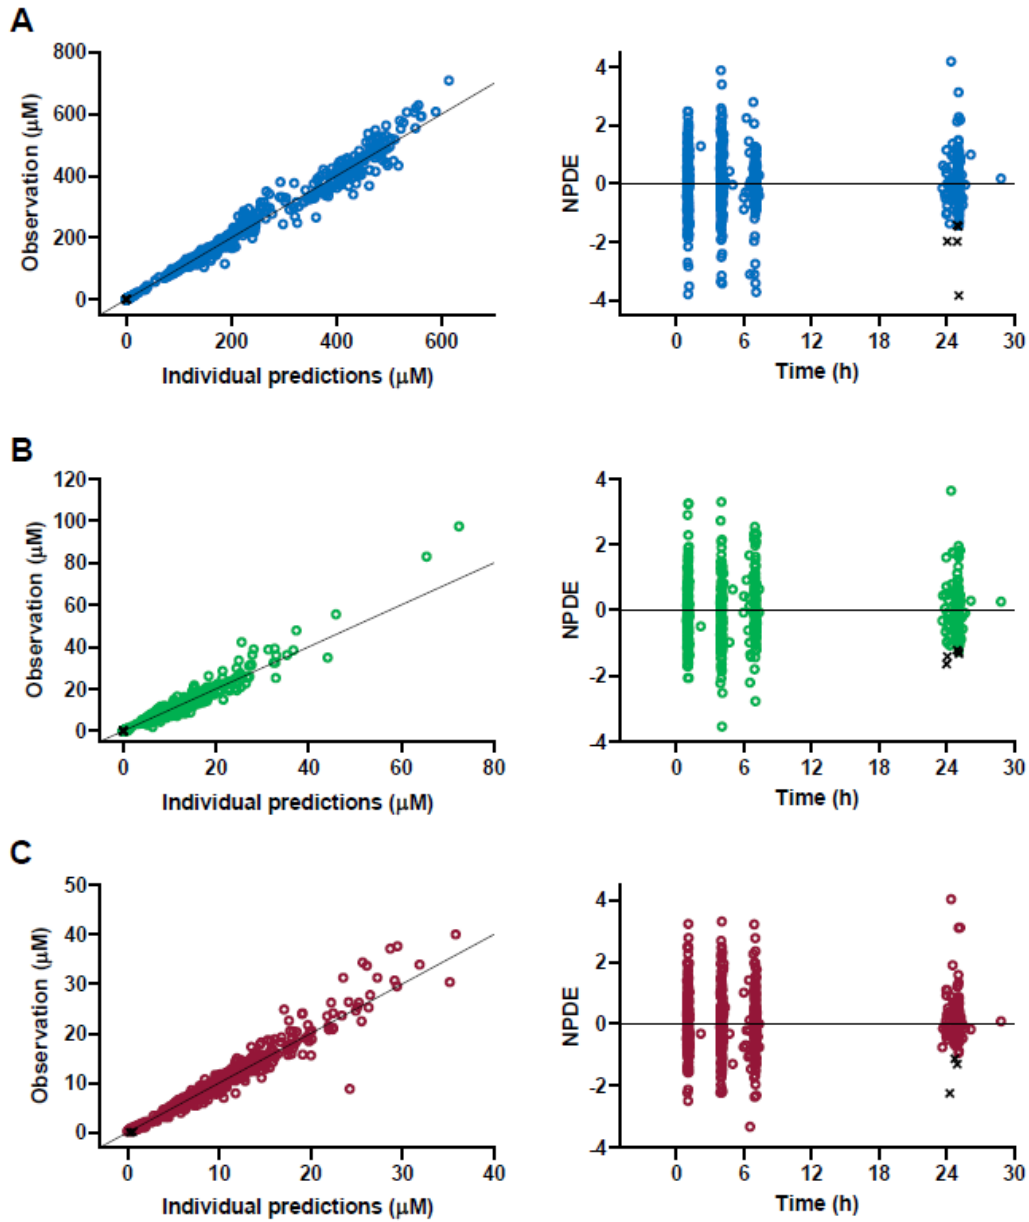

For each compound, the left panel represents the individual model predictions vs the observed concentrations, and solid black line denotes the identity line. The right panel represents the normalized prediction distribution errors (NPDE) vs time, and solid black line denotes the  $y = 0$  line. Red circles represent data below the limit of quantification. The diagnostic plots show a good distribution of the data along the identity line or the  $y = 0$  line.
