# Supplementary material
Source: PubMed Central journal article supplement (PMC7124978)
Supplement: NIHMS1545018-supplement-5.pdf [file NIHMS1545018-supplement-5.pdf]

**Figure S4.** Visual predictive checks of the pharmacokinetic base model for cyclophosphamide (A), 4OH-CTX (B), and CEPM (C).

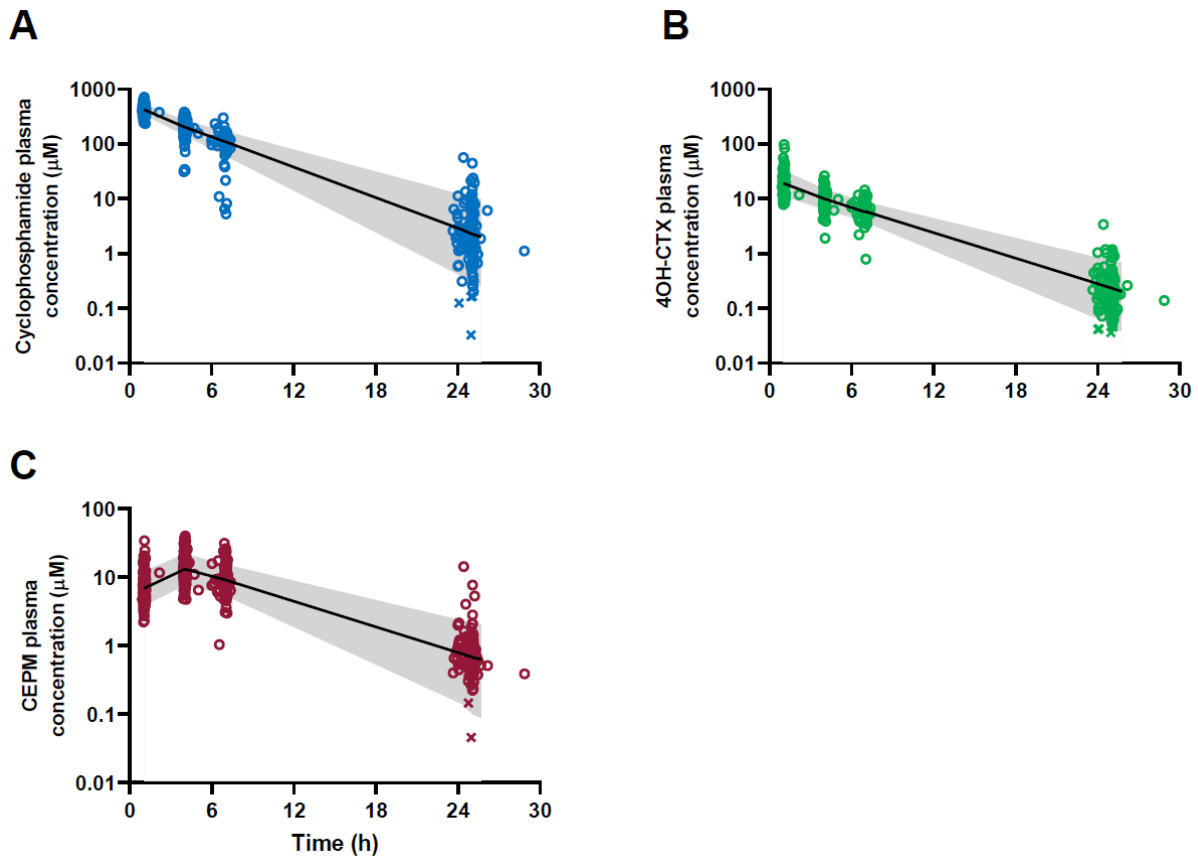

In each graph, open-circles are the observed concentration-time data, and crosses are the concentrations below the limit of quantification. Solid lines represent the 50<sup>th</sup> percentile of the model simulations. Shaded gray areas represent the 90% prediction interval (5<sup>th</sup>–95<sup>th</sup> percentiles) of the model simulations. The central tendency and the variability of cyclophosphamide, 4OH-CTX, and CEPM concentrations were well predicted by the pharmacokinetic model.
