# Supplementary material
Source: PubMed Central journal article supplement (PMC7124978)

**Figure S7.** Distribution of drug exposures in patients receiving platelet (A) and red blood cell (B) transfusions vs patients without any transfusion support. *P* values obtained from Wilcoxon–Mann-Whitney tests.

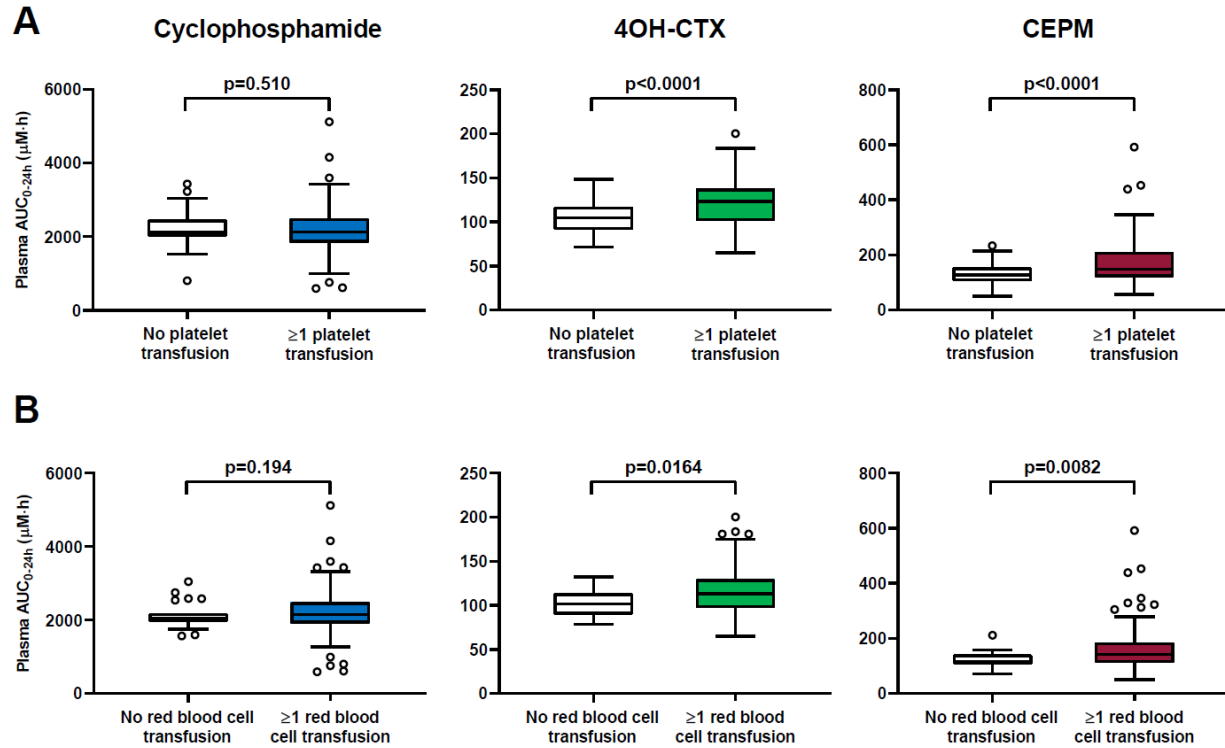

Supplement: NIHMS1545018-supplement-8.pdf [file NIHMS1545018-supplement-8.pdf]
