# Supplementary material
Source: PubMed Central journal article supplement (PMC7124978)

**Figure S6.** Correlation between drug exposures at 24 hours ( $AUC_{0-24h}$ ) and total drug exposures ( $AUC_{0-\infty}$ )

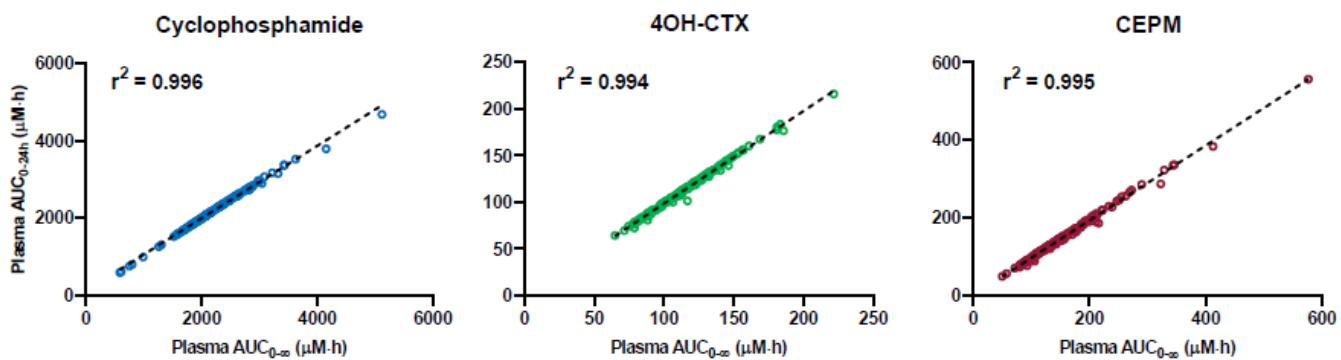

Supplement: NIHMS1545018-supplement-7.pdf [file NIHMS1545018-supplement-7.pdf]
